# Supplementary material for: Improving ternary blend morphology by adding a conjugated molecule into non-fullerene polymer solar cells
Source: Royal Society of Chemistry journal article supplement (doi:10.1039/d0ra08090j), 2020-01-01
Supplement: d0ra08090j1.pdf [file d0ra08090j1.pdf]

## Supplementary Information

### **Improving Ternary Blend Morphology by Adding Conjugated**

### **Molecule in Non-fullerene Polymer Solar Cells**

Di Zhao<sup>a</sup>, Pengcheng Jia<sup>a</sup>, Ling Li<sup>a</sup>, Yang Tang<sup>a</sup>, Qihong Cui<sup>\*,a</sup>, Chuanlang Zhan<sup>\*,b</sup>, Yanbing Hou<sup>a</sup>, Yufeng Hu<sup>a</sup>, Zhidong Lou<sup>a</sup>, Feng Teng<sup>\*,a</sup>

- a) Key Laboratory of Luminescence and Optical Information, Ministry of Education, Beijing Jiao tong University, Beijing, 100044, China  
E-mail: qhcui@bjtu.edu.cn (Qihong Cui), fteng@bjtu.edu.cn (Feng Teng).
- b) Beijing National Laboratory for Molecular Sciences, CAS Key Laboratory of Photochemistry, Institute of Chemistry, Chinese Academy of Sciences, Beijing 100190, China  
E-mail: clzhan@iccas.ac.cn (Chuanlang Zhan)

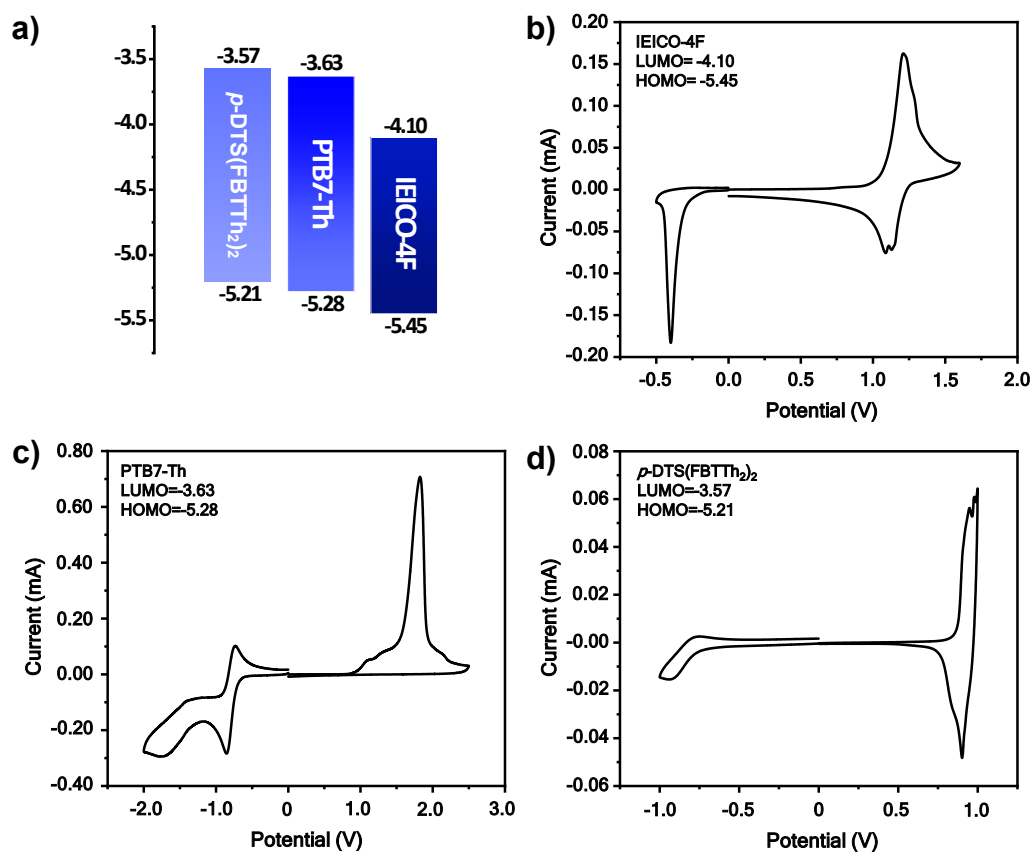

**Fig S1.** Energy level diagrams for IEICO-4F, PTB7-Th, and  $p$ -DTS(FBTTh<sub>2</sub>)<sub>2</sub>. It is obvious that the HOMO of two donors (PTB7-Th and  $p$ -DTS(FBTTh<sub>2</sub>)<sub>2</sub>) is almost equal, which is significantly reduce the sacrifice of  $V_{OC}$  of ternary solar cells.

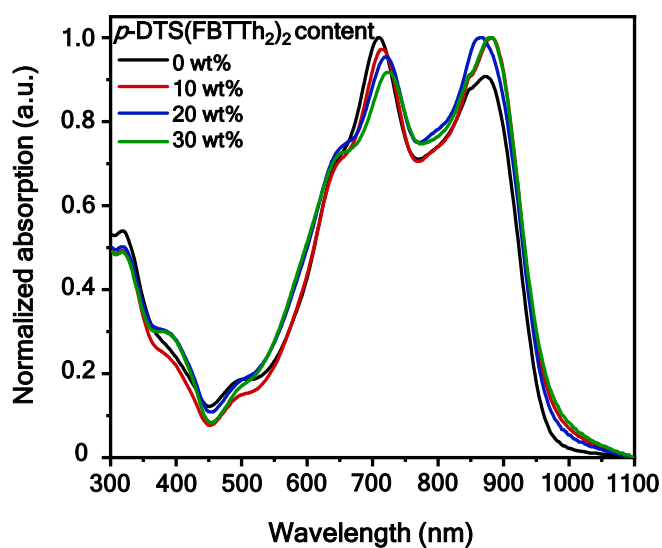

**Fig S2.** The Normalized absorption of blend film with different  $p$ -DTS(FBTTh<sub>2</sub>)<sub>2</sub> contents.

The red shift around 700 nm is coincide with the EQE red shift in the spectra of 500-700 nm.

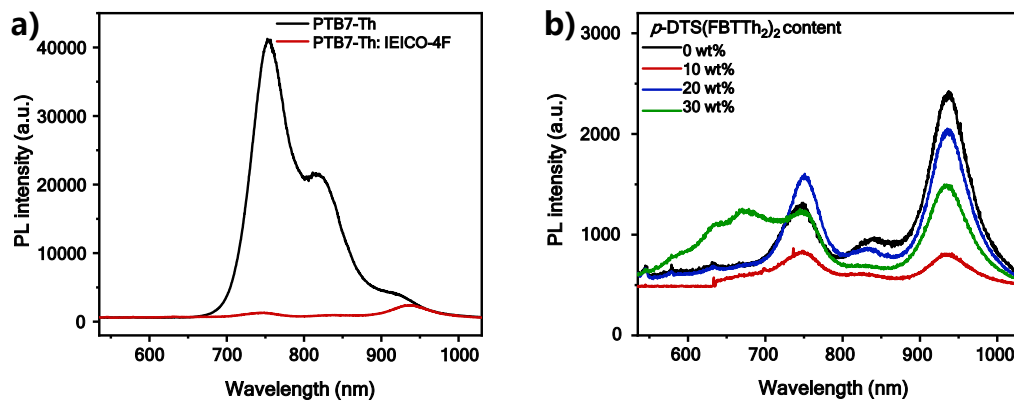

**Fig S3.** (a) The PL (photoluminescence) of PTB7-Th pure film and PTB7-Th: IEICO-4F blend film; (b) The PL of blend film with different  $p$ -DTS(FBTTh<sub>2</sub>)<sub>2</sub> contents.

**Table S1.** Hole and electron mobility in PSCs with different ratio of  $p$ -DTS(FBTTh<sub>2</sub>)<sub>2</sub> in the binary film.

| $p$ -DTS(FBTTh <sub>2</sub> ) <sub>2</sub><br>Content (wt%) | $\mu_e$<br>(cm <sup>2</sup> v <sup>-1</sup> s <sup>-1</sup> ) | $\mu_h$<br>(cm <sup>2</sup> v <sup>-1</sup> s <sup>-1</sup> ) | $\mu_e/\mu_h$ |
|-------------------------------------------------------------|---------------------------------------------------------------|---------------------------------------------------------------|---------------|
| 0 wt%                                                       | 1.156*10 <sup>-3</sup>                                        | 0.997*10 <sup>-3</sup>                                        | 1.25          |
| 10 wt%                                                      | 2.272*10 <sup>-3</sup>                                        | 2.029*10 <sup>-3</sup>                                        | 1.12          |
| 20 wt%                                                      | 2.860*10 <sup>-3</sup>                                        | 2.181*10 <sup>-3</sup>                                        | 1.31          |
| 30 wt%                                                      | 1.761*10 <sup>-3</sup>                                        | 1.243*10 <sup>-3</sup>                                        | 1.42          |
